# Supplementary material for: Tomato MicroRNAs and Their Functions
Source: MDPI journal article supplement (doi:10.3390/ijms231911979), 2022-10-09
Supplement: s1 [file s1]

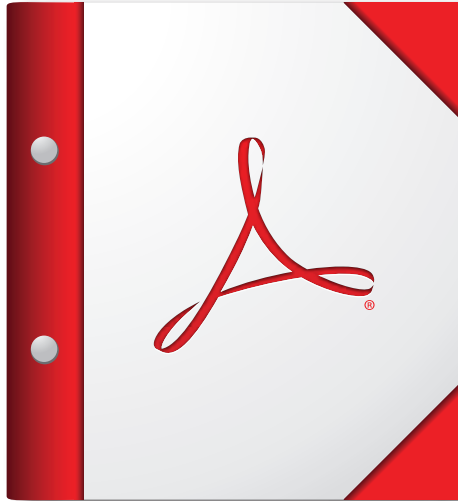

**For the best experience, open this PDF portfolio in  
Acrobat X or Adobe Reader X, or later.**

**Get Adobe Reader Now!**
